# Supplementary material for: Conjugating Methotrexate to magnetite (Fe3O4) nanoparticles via trichloro-s-triazine
Source: Royal Society of Chemistry journal article supplement (doi:10.1039/b902373a), 2009-01-01
Supplement: b902373a.pdf [file b902373a.pdf]

Supplementary Information

## Conjugating Methotrexate to Magnetite (Fe<sub>3</sub>O<sub>4</sub>) Nanoparticles via Trichloro-s-Triazine

Kaylie L. Young, Chenjie Xu, Jin Xie, and Shouheng Sun\*

*Department of Chemistry, Brown University, Providence RI 02912*

*Email: ssun@brown.edu*

### Synthesis of Fe<sub>3</sub>O<sub>4</sub> nanoparticles

All reagents were purchased from Sigma-Aldrich and all solvents were purchased from Mallinckrodt Chemicals (Phillipsburg, NJ) unless otherwise noted. 10 ml of benzyl ether, 10 ml of oleylamine, and 0.7064 g (2mmol) iron(II) acetylacetonate (Fe(acac)<sub>3</sub>) were mixed in a round bottom flask at room temperature. A magnetic stir bar was used to stir the solution throughout the reaction. The solution was heated using a heating mantle under nitrogen flow at 120°C for 2 hours and then at 240°C for 1 hour. The nitrogen flow was then reduced to a “nitrogen blanket” and the solution was heated for 1 hour at 300°C. The resulting nanoparticles were dispersed in hexane and washed several times by adding ethanol to the reaction mixture (with a 2:1 ethanol: sample ratio) and centrifuging (Beckman Coulter Allegra 64R Centrifuge) for 5 minutes at 8000 RPM. The nanoparticles (NPs) were stored in hexane.

### Synthesis of TsT-PEG-TsT precursor

0.55g of TsT, 3.0 g of 6000 molecular weight PEG (Fluka Chemie, Germany), 0.5 g sodium carbonate (Fisher Scientific, Fair Lawn, NJ), and 100 ml of benzene were added to a round bottom flask and stirred overnight with a magnetic stir bar. The reaction mixture was separated into centrifuge tubes and washed by adding petroleum ether to the reaction mixture (with a 2:1 ether: sample ratio) and centrifuging for 10 minutes at 8000 RPM. After several washings, the solid white material was dried in an oven and stored in the refrigerator.

### Conjugation of methotrexate to Fe<sub>3</sub>O<sub>4</sub> nanoparticles

2 mg of methotrexate (L-Amethopterin hydrate, 98%) was dissolved in 250 µl of dimethyl sulfoxide (DMSO) and mixed with an 50 µl aqueous solution containing 3 mg of 1-ethyl-3-(3-dimethylaminopropyl)carbodiimide (EDAC) and 1 mg of N-hydroxysuccinimide (NHS). After 10 minutes the MTX/EDAC/NHS mixture was added to the NH<sub>2</sub>- terminated Fe<sub>3</sub>O<sub>4</sub> nanoparticles and stirred overnight under aluminum foil to avoid light exposure.



Supplementary Material (ESI) for Journal of Materials Chemistry

This journal is (c) The Royal Society of Chemistry 2009

Fig. S1 MALDI mass spectrometry data for NH<sub>2</sub>-terminated NPs (A) and MTX-conjugated NPs (B). The average molecular weight for NH<sub>2</sub>-terminated NPs is 6224. The average molecular weight for MTX-conjugated NPs is 6590.
